# Supplementary material for: Improved filtration method to isolate pure populations of primary bovine endometrial epithelial and stromal cells for immunological studies
Source: PubMed Central journal article supplement (PMC7039867; doi:10.1007/s11259-020-09770-3), 2020-02-21

**Additional File 1. Optimisation of dissection technique.**

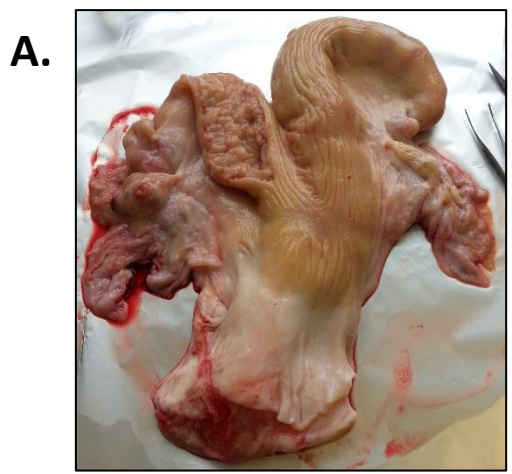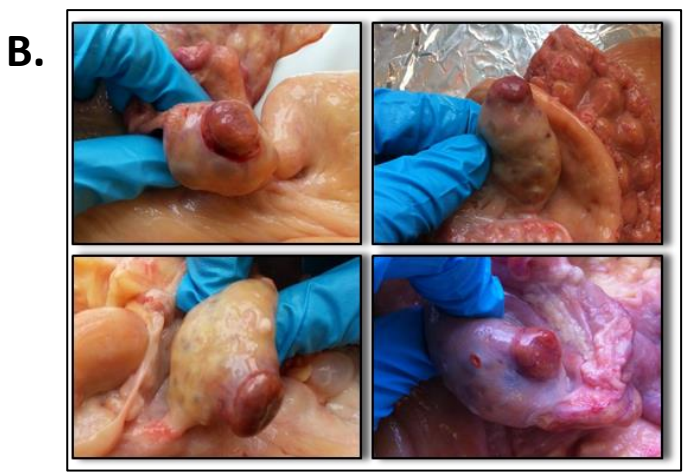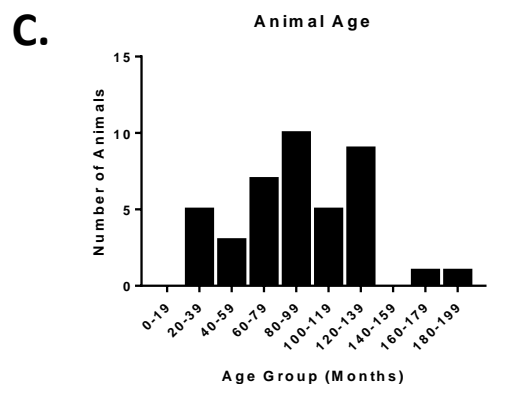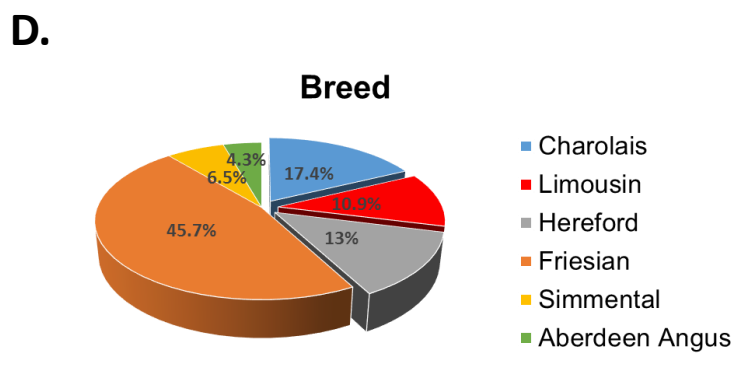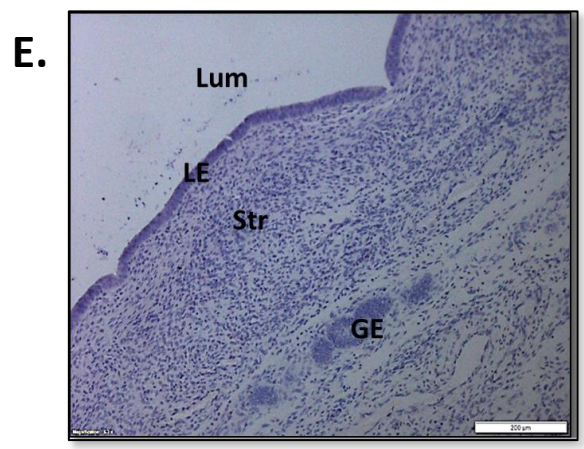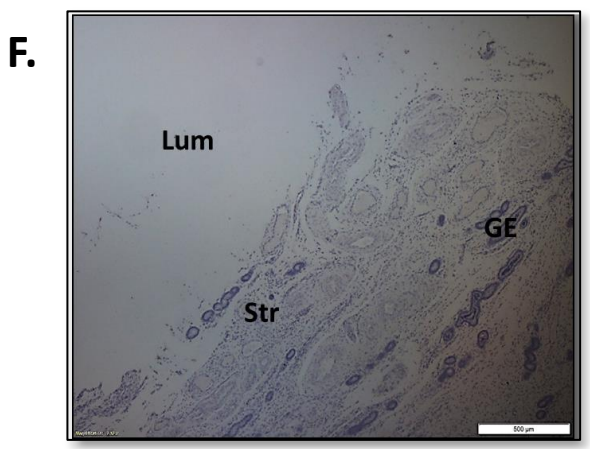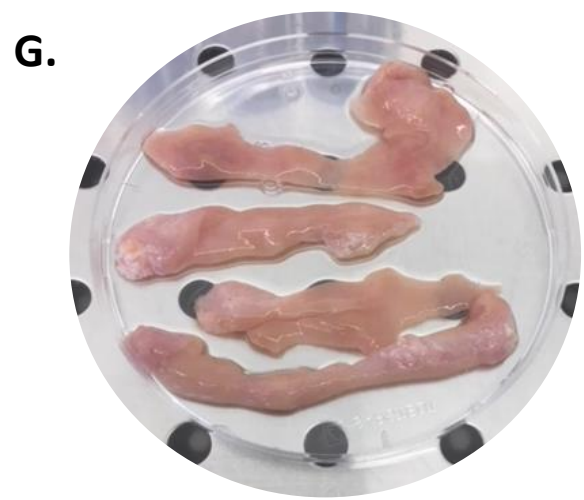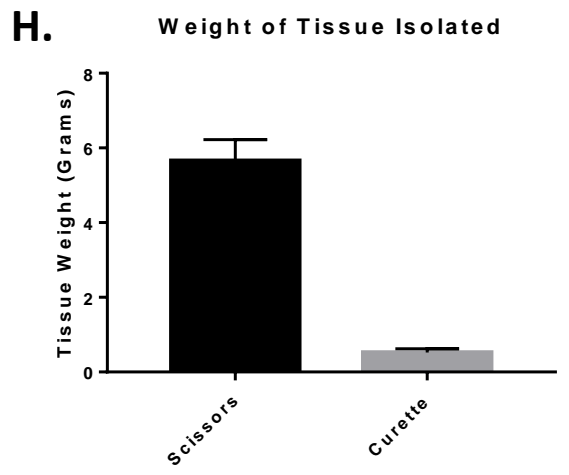

Supplement: 11259_2020_9770_MOESM1_ESM.pdf [file 11259_2020_9770_MOESM1_ESM.pdf]
